# Supplementary material
Source: publisher figshare collection journal article supplement (https://gsajournals.figshare.com/ndownloader/files/23534987)
Supplement: Supplementary file 1 [file 23534987]

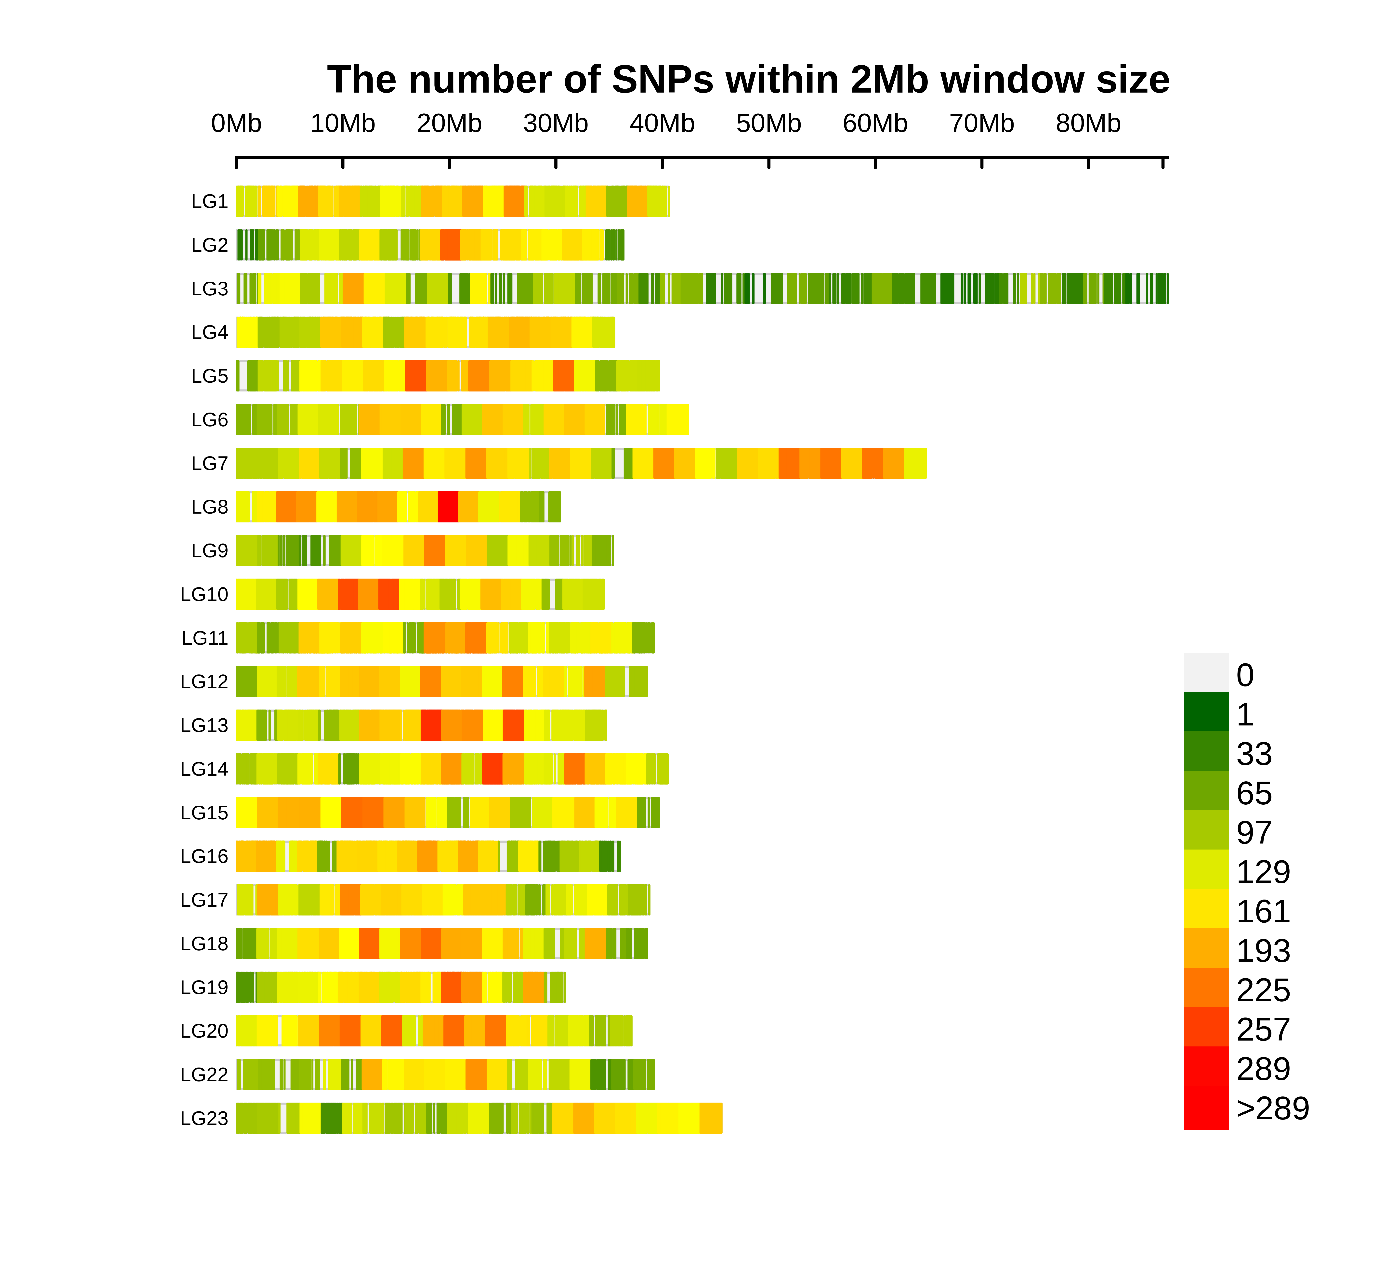


**Figure S1.** Distribution of SNPs of the ~65K SNP array on the Nile tilapia genome. SNP density was estimated using a 2Mb window size and visualized using the R package CMplot (https://github.com/YinLiLin/R-CMplot).
